# Supplementary material
Source: PubMed Central journal article supplement (PMC2698457)
Supplement: NIHMS106457-supplement-Supplemental_Table_1.pdf [file NIHMS106457-supplement-Supplemental_Table_1.pdf]

Supplemental Table 1. Nucleus Accumbens Core and Shell TH-ir Integrated Density in 3 and 12 Month Old GDNF<sup>+/-</sup> vs. WT Mice Treated With Saline or METH.

|                            | 3 months          |                  | 12 months         |                  |
|----------------------------|-------------------|------------------|-------------------|------------------|
| Treatment Groups           | NAc Core          | NAc Shell        | NAc Core          | NAc Shell        |
| WT Saline                  | 57317.19±8714.78  | 34071.87±7660.33 | 49804.59±15.06.96 | 49857.83±1655.20 |
| WT METH                    | 48550.01±10810.61 | 42761.11±8743.02 | 48437.36±2357.06  | 44485.75±4064.11 |
| GDNF <sup>+/-</sup> Saline | 65067.32±11781.79 | 37095.90±8653.49 | 50489.08±1608.58  | 47447.53±2629.66 |
| GDNF <sup>+/-</sup> METH   | 60146.90±9561.61  | 43129.82±6876.29 | 46334.78±2523.74  | 42128.81±3045.59 |
